# Supplementary material for: A dense SERS substrate of the AgNPs@GO compound film for detecting homocysteine molecules
Source: Royal Society of Chemistry journal article supplement (doi:10.1039/d3ay01396k), 2023-01-01
Supplement: d3ay01396k1.pdf [file d3ay01396k1.pdf]

## Supporting Information

### **A dense SERS substrate of AgNPs@GO compound film for detecting homocysteine molecules**

**Song He<sup>1,2</sup>, Li Yang<sup>2,3</sup>, Tianwen Xu<sup>2,3</sup>, Xishun Peng<sup>2,3</sup>, Qixin chen<sup>3</sup>, Xinghua Li<sup>3</sup>, Yiheng Yuan<sup>2,3</sup>, Cheng Zuo<sup>3</sup>, Xin Zhang<sup>3</sup>, Zhongchen Bai<sup>2,3\*</sup>**

<sup>1</sup>. Guizhou provincial people's hospital, Guiyang City, 550002, China

<sup>2</sup>. College of Medicine, Guizhou University, Guiyang City, 550025, China

<sup>3</sup>. Guizhou Province Key Lab. for Photoelectric Technology and Application, Guizhou University, Guiyang City, 550025, China.

E-mail: [zcbai@gzu.edu.cn](mailto:zcbai@gzu.edu.cn)

## Supporting Figures

### 1. Figure S1

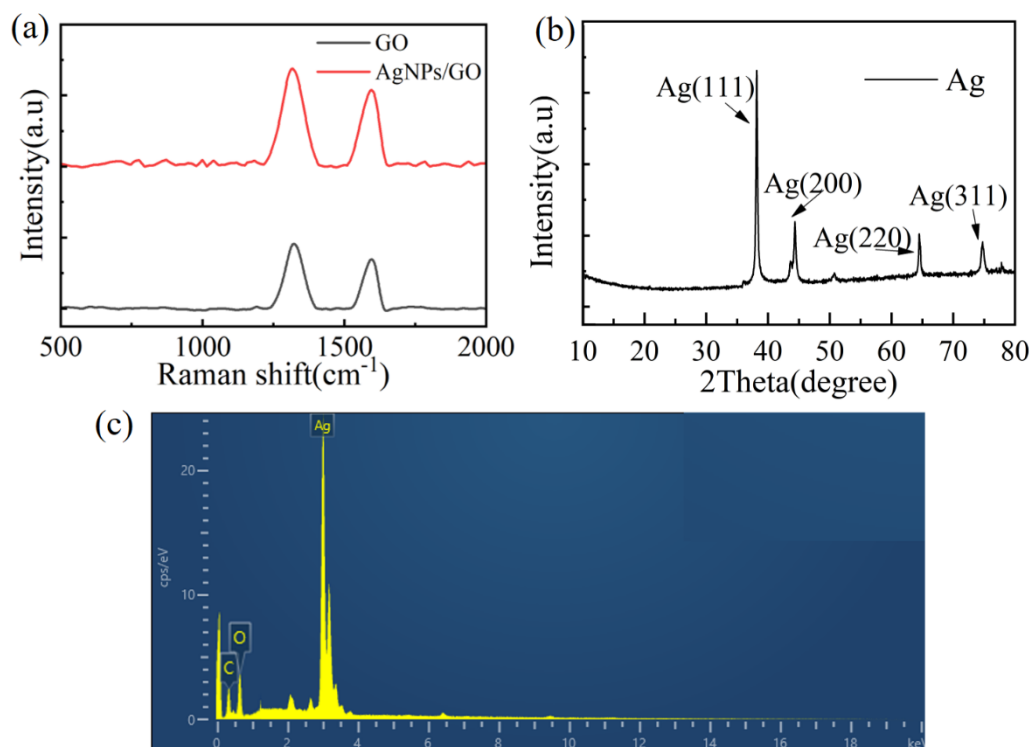

Figure S1. (a) Raman spectra of GO and AgNPs@GO; (b) XRD picture of AgNPs of AgNPs@GO; (c) EDS spectrum of AgNPs@GO SERS substrate.

### 2. Figure S2

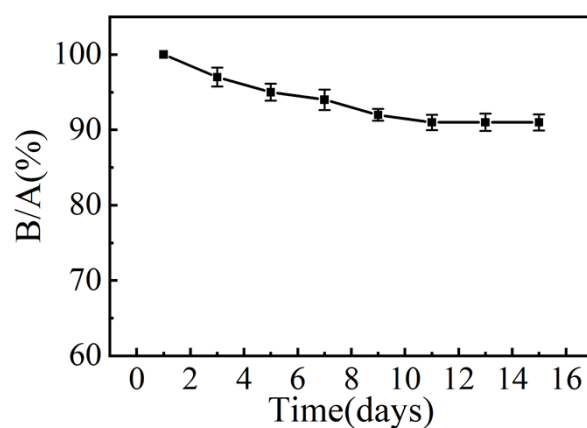

Figure S2. Stability of the optimal AgNPs@GO SERS substrate.

## Supporting Tables

Table S1. SERS enhancement factors of different electrodeposition times.

| Samples                 | 1    | 2     | 3       | 4       | 5       | 6       |
|-------------------------|------|-------|---------|---------|---------|---------|
| Depositing time (min)   | 0    | 10    | 20      | 30      | 40      | 50      |
| Peak value (units)      | 23   | 1036  | 11958.1 | 26126.9 | 23604.8 | 19165.2 |
| Enhancement factor (EF) | None | 450.4 | 5199.1  | 11359.5 | 10262.9 | 8333.0  |
